1 **Descriptive epidemiology of physical activity energy expenditure in UK adults.**

2 **The Fenland Study.**

3

4 Authors:

5 Tim Lindsay, Kate Westgate, Katrien Wijndaele, Stefanie Hollidge, Nicola Kerrison, Nita

6 Forouhi, Simon Griffin, Nick Wareham, Søren Brage

7

8 MRC Epidemiology Unit, University of Cambridge, United Kingdom

9

10 Running title: **Epidemiology of energy expenditure**

11 Keywords: physical activity, energy expenditure, sociodemographic, combined sensing

12 Address for correspondence: Dr Søren Brage

13 MRC Epidemiology Unit

14 University of Cambridge

15 School of Clinical Medicine

16 Box 285, Institute of Metabolic Science

17 Cambridge Biomedical Campus

18 Cambridge CB2 0QQ

19 United Kingdom

20 Phone: + 44 1223 769 116

21 E-mail: [soren.brage@mrc-epid.cam.ac.uk](mailto:soren.brage@mrc-epid.cam.ac.uk)

22 **Abstract**

23 **Background:** Physical activity (PA) plays a role in the prevention of a range of diseases  
24 including obesity and cardiometabolic disorders. Large population-based descriptive  
25 studies of PA, incorporating precise measurement, are needed to understand the  
26 relative burden of insufficient PA levels and to inform the tailoring of interventions.  
27 Combined heart and movement sensing enables the study of physical activity energy  
28 expenditure (PAEE) and intensity distribution. We aimed to describe the  
29 sociodemographic correlates of PAEE and moderate-to-vigorous physical activity  
30 (MVPA) in UK adults.

31  
32 **Methods:** The Fenland study is a population-based cohort study of 12,435 adults aged  
33 29–64 years-old in Cambridgeshire, UK. Following individual calibration (treadmill),  
34 participants wore a combined heart rate and movement sensor continuously for 6 days  
35 in free-living, from which we derived PAEE ( $\text{kJ}\cdot\text{day}^{-1}\cdot\text{kg}^{-1}$ ) and time in MVPA ( $>3$  &  $>4$   
36 METs) in bouts greater than 1 minute and 10 minutes. Socio-demographic information  
37 was self-reported. Stratum-specific summary statistics and multivariable analyses were  
38 performed.

39  
40 **Results:** Women accumulated a mean(sd)  $50(20)$   $\text{kJ}\cdot\text{day}^{-1}\cdot\text{kg}^{-1}$  of PAEE, and  $83(67)$   
41 and  $33(39)$   $\text{minutes}\cdot\text{day}^{-1}$  of 1-min bouted and 10-min bouted MVPA respectively. By  
42 contrast, men recorded  $59(23)$   $\text{kJ}\cdot\text{day}^{-1}\cdot\text{kg}^{-1}$ ,  $124(84)$  and  $60(58)$   $\text{minutes}\cdot\text{day}^{-1}$ . Age  
43 and BMI were also important correlates of PA. Association with age was inverse in both  
44 sexes, more strongly so for PAEE than MVPA. Obese individuals accumulated less PA

45 than their normal-weight counterparts whether considering PAEE or allometrically-  
46 scaled PAEE ( $-10 \text{ kJ}\cdot\text{day}^{-1}\cdot\text{kg}^{-1}$  vs  $-15 \text{ kJ}\cdot\text{day}^{-1}\cdot\text{kg}^{-2/3}$  in men). Higher income and  
47 manual work were associated with higher PA; manual workers recorded  $13\text{-}16 \text{ kJ}\cdot\text{kg}^{-1}$   
48  $\cdot\text{day}^{-1}$  more PAEE than sedentary counterparts. Overall, 86% of women and 96% of  
49 men accumulated  $21.4 \text{ min}\cdot\text{day}^{-1}$  of MVPA ( $>3$  METs) on average (150 minutes per  
50 week). These values were 49% and 74% if only considering bouts  $>10$  min (15% and  
51 31% for  $>4$  METs).

52

53 **Conclusions:** PA varied by age, sex and BMI, and was higher in manual workers and  
54 those with higher incomes. Light physical activity was the main driver of PAEE; a  
55 component of PA that is currently not quantified as a target in UK guidelines.

56

57

58

59

60

61

62

63

64

65

66

67

68 **Background**

69

70 Physical activity (PA) plays an important role in the prevention of a range of diseases  
71 including obesity and cardiometabolic disorders [1–3]. It is hence an important  
72 behavioural target for public health interventions, and guidelines describing desired  
73 levels of PA have been proposed [4, 5]. In order to assess the population burden of  
74 insufficient levels of PA, and develop effective, tailored interventions, it is important to  
75 describe physical activity levels and examine the socio-demographic correlates.

76

77 Human behaviour occurs across an intensity spectrum ranging from sleep and  
78 sedentary behaviour (SS), to light physical activity (LPA), moderate physical activity  
79 (MPA) and vigorous physical activity (VPA). Typically, these intensities are grouped  
80 according to a metabolic equivalent of task (METs), e.g. LPA considered as 1.5-3  
81 METs, MPA as 3-6 METs, and VPA as greater than 6 METs, although such  
82 classification is far from universal [6]. Recent updates in physical activity guidelines  
83 emphasize the importance of moderate-to-vigorous PA (MVPA) but increasingly  
84 recognise the importance of all subcomponents of the entire intensity spectrum [4].  
85 Moreover, the 2018 guidelines for Americans no longer include the requirement for  
86 activity to occur in bouts of at least 10-min duration. Whilst other countries may adopt  
87 this definition, it is far from universal and the consequences of such reclassification in  
88 terms of activity levels in different socio-demographic groups are not well documented  
89 with objective measurements in large cohorts.

90

91 Objectively measured PAEE of smaller British cohorts has been reported, including a  
92 nationally representative sample of children and adults measured with the doubly  
93 labelled water method [7]; however, this method can only assess total volume of PAEE,  
94 and the sample was too small ( $n = 770$ ) to describe socio-demographic differences. Two  
95 other British cohort studies have described PAEE and its underlying intensity  
96 distribution, one in adolescents aged 16y and one in older adults aged between 60 and  
97 64y, respectively [8, 9]. The descriptive epidemiology of PAEE and intensity in younger  
98 to middle-aged UK adults has not yet been reported. To fill this knowledge gap, we used  
99 data from the Fenland cohort, an ongoing population-based observational study of  
100 12,435 adults aged 29-64 years of age, residing in Cambridgeshire, UK. We aimed to  
101 describe the objectively measured levels of PAEE and underlying intensity patterns by  
102 socio-demographic characteristics.

103

## 104 **Methods**

### 105 **Study population**

106 Participants born between 1950 and 1975 were recruited to the Fenland Study from  
107 general practice lists between 2005 and 2015. Exclusion criteria included pregnancy,  
108 physician-diagnosed diabetes, inability to walk unaided, psychosis, and terminal illness.  
109 In total, 12,435 participants, aged 29–64 years old, were enrolled and attended one of  
110 three clinical research facilities (Ely, Cambridge, and Wisbech) after an overnight fast.  
111 All participants provided written informed consent and the study was approved by the  
112 local ethics committee (NRES Committee – East of England Cambridge Central) and  
113 performed in accordance with the Declaration of Helsinki. In addition, approval was

114 granted to compare general practice-held information (age, sex, height, weight,  
115 smoking, alcohol consumption, area deprivation score) for participants with the overall  
116 eligible sample (under UK Section 251 legislation).

117

### 118 Anthropometry and other clinical measures

119 Height was measured with a rigid stadiometer (SECA 240; Seca, Birmingham, UK) and  
120 weight was measured in light clothing with calibrated scales (TANITA model BC-418  
121 MA; Tanita, Tokyo, Japan). Seated blood pressure was measured with an automated  
122 sphygmomanometer (Omron, 705CP-II) and a 12-lead ECG (Seca CT6i) was obtained  
123 during supine rest. Participants were cleared for submaximal exercise testing if blood  
124 pressure was <180/110 mm Hg, no serious anomalies were observed on the ECG,  
125 alongside appropriate responses to medical screening questions and a review of  
126 medication (e.g. high-dose betablocker use were excluded from the treadmill test).

127

### 128 Objective physical activity assessment

129 Participants were fitted with a combined heart rate and uniaxial movement sensor  
130 (Actiheart, CamNtech, Papworth, UK), attached to the chest with standard ECG  
131 electrodes [10]. Participants had their heart rate measured continuously during a 6-min  
132 supine rest test and then underwent a submaximal treadmill test consisting of 9-min of  
133 walking on the flat with increasing speed, 6-min walking at increased gradient, and 5-  
134 min of jogging on the flat as previously described [11]. Heart rate was measured  
135 continuously and the test was terminated when heart rate reached 90% of age-  
136 predicted maximum [12], or had been above 80% for longer than 2-min, or the

137 participant requested to stop. At the end of the clinical visit, participants were asked to  
138 wear the heart rate and movement sensor, initialised to collect data at 1-min resolution,  
139 for the following 6 days [10], and to return the monitor by freepost. Participants were  
140 advised that the device was waterproof and should be worn continuously, including  
141 during showering, water-based activities, and sleeping, whilst continuing with their usual  
142 activities. It could be removed to change electrodes, spare sets of which were provided.

143  
144 Following pre-processing of the free-living heart rate data to eliminate potential noise  
145 [13], heart rate was individually calibrated using parameters obtained from the treadmill  
146 test [11] and combined with acceleration in a branched equation model [14] to calculate  
147 instantaneous PAEE ( $\text{J}\cdot\text{kg}^{-1}\cdot\text{min}^{-1}$ ); this measure of intensity agrees well with intensity  
148 measured using indirect calorimetry [15, 16]. For participants without sufficient treadmill  
149 data for individual calibration ( $n = 468$  of 12002), an age-, sex-, and sleeping heart rate  
150 (SHR) adjusted group calibration was used, derived on all other participants as follows:

151

$$\begin{aligned} PAEE [\text{J}\cdot\text{kg}^{-1}\cdot\text{min}^{-1}] &= (5.64 + 0.0085 * age + 0.944 * sex + 0.0045 * SHR + 1.24 * betablocker) * HRaS \\ &- 0.42 * age - 0.48 * sex - 0.14 * SHR + 0.03 * SHR * sex + 21.5 * betablocker - 42.03 \end{aligned}$$

152 (age in years, sex coded as 1 for men and 0 for women, SHR in beats per minute, heart  
153 rate above sleep (HRaS) in beats per minute, and betablocker coded as 0 or 1 if the  
154 participant was taking betablocker medication).

155

156 Intensity was expressed in standard metabolic equivalents (METs), using 1 MET = 71  
157  $\text{J}\cdot\text{min}^{-1}\cdot\text{kg}^{-1}$  ( $\sim 3.5 \text{ ml O}_2\cdot\text{min}^{-1}\cdot\text{kg}^{-1}$ ).

158

159 Segments of data with continuous zero acceleration lasting  $\geq 90$  minutes were classified  
160 as 'non-wear' if also accompanied by non-physiological HR data, i.e. consistently high  
161 Bayesian error [17]. Average daily PAEE (in  $\text{kJ}\cdot\text{day}^{-1}\cdot\text{kg}^{-1}$ ) and time spent at multiple  
162 intensity levels (up to 10 METs) and in at least moderate intensity bouts was  
163 summarised, whilst minimising potential diurnal bias by imbalance of wear time [18].  
164 This method has been successfully validated against PAEE from doubly-labelled water  
165 in UK men and women [19]. Time and energy spent at specific intensity levels were  
166 grouped together and defined as sedentary/sleep (SS), light physical activity (LPA),  
167 moderate physical activity (MPA) and vigorous physical activity (VPA). Activity bouts of  
168 at least 3 and 4 MET (moderate) intensity were calculated in durations ranging from 1 to  
169 10 mins. For the primary analysis SS was defined as  $< 1.5$  METs, LPA as 1.5-3 METs,  
170 MPA as 3-6 METs, and VPA as  $> 6$  MET. Sensitivity analyses were conducted using  
171 LPA as 1.5-4 METs, MPA as 4-7 METs, and VPA as  $> 7$  METs, and allometrically scaled  
172 PAEE (in  $\text{kJ}\cdot\text{day}^{-1}\cdot\text{kg}^{-2/3}$ ) as previously described [20, 21].

173

174 For the present analysis, participants were excluded ( $n=351$ ) if they had worn their  
175 sensors for  $< 72$  hours overall, or  $< 8$  hours accumulative wear for each quadrant of the  
176 day (3am to 9am, 9am to 3pm, 3pm to 9pm, 9pm to 3am). Furthermore, activity records  
177 were excluded if they did not measure  $0 \text{ m}\cdot\text{s}^{-2}$  at some point (indicating no movement)



178 during the monitoring period to safeguard the analysis from technical accelerometer  
179 errors (n=82).

180

### 181 Covariates

182 Socio-demographic and lifestyle behavioural information was collected using self-report.

183 This included age, sex, ethnicity, work-type/status (sedentary, standing, manual, retired,

184 unemployed), marital status (single, married/cohabiting, widowed/separated/divorced),

185 education (compulsory, further – A-level/apprenticeship/sub-degree level, higher –

186 degree level or above), household income level (<£20,000, £20,000 - £40,000,

187 >£40,000), smoking status (never, former, current) and alcohol intake (units/week). In

188 addition, location (Cambridge, Ely, Wisbech) and season of physical activity

189 measurement was considered (coded as two orthogonal sine functions; “Winter”

190 peaking at 1 on January 1<sup>st</sup> and reaching a minimum of -1 on July 1<sup>st</sup>, and Spring

191 peaking at 1 on April 1<sup>st</sup> and reaching a minimum of -1 on October 1<sup>st</sup>).

192

### 193 Statistics

194 All analyses were sex-stratified. We report medians (inter-quartile ranges) or means

195 (standard deviations) for descriptive purposes for continuous variables and proportions

196 for categorical variables. We performed linear test for trend of activity differences for

197 ordinal covariates and likelihood-ratio tests for categorical covariates. We used sex-

198 stratified multivariable linear regression to model the independent associations of

199 activity outcomes with age, BMI, education level, work-type, income, marital status, test

200 site, smoking status, ethnicity, and season of activity measurement. For this analysis,  
201 missing data in categorical variables were coded as a separate category.

202  
203 Using all available information from the general practices, we compared all invited vs all  
204 participating by two-sample, unpaired t-test for continuous variables and chi square test  
205 for categorical variables. All statistical analyses were performed using Stata/SE version  
206 14.

207

## 208 **Results**

209 A total of 46,024 individuals were invited, of whom 12,435 (27% response rate) agreed  
210 to participate. General practice information was obtained on 45,043 individuals including  
211 12,145 study participants; one practice could not provide any standard information  
212 (n=180), and a few additional participants did not consent to this linkage, had no valid  
213 NHS number or their GP surgery information was missing (n=110). Compared to the  
214 overall sampling frame participants were approximately 18 months older, had lower BMI  
215 [0.2 (men); 0.8 (women) kg/m<sup>2</sup> lower], were less likely to smoke, and had marginally  
216 lower deprivation scores. Although there was a higher prevalence of alcohol drinkers,  
217 participants drank fewer units per week (Supplementary Table 1).

218

219 Of the 12,435 participants, 12,002 (91% White) met the combined sensing inclusion  
220 criteria for the present analysis, more women (n=6,428) than men (n=5,574). This  
221 subsample did not significantly differ from the full Fenland sample, with the exception of  
222 men being 0.1 years younger (p=0.02).

223  
224 Mean (SD) PAEE for women was 50 (20)  $\text{kJ}\cdot\text{day}^{-1}\cdot\text{kg}^{-1}$  compared to 59 (23)  $\text{kJ}\cdot\text{day}^{-1}\cdot\text{kg}^{-1}$   
225 for men (Table 1). Women recorded an average of 83 (67) minutes per day of MVPA,  
226 of which 33 (39) min/day occurred in bouts of 10-min or longer, whereas men recorded  
227 124 (85) and 60 (58) min/day, respectively. Of note, despite the differences in PAEE  
228 and MVPA as measured by combined sensing, women and men did not differ by chest  
229 acceleration. Further participant characteristics are listed in Table 1 and univariable  
230 analysis by category in Supplementary Table 2.

231  
232 Age and BMI were important correlates of PAEE, 1-minute bouted MVPA and 10-minute  
233 bouted MVPA, with levels of all three outcomes significantly lower in the oldest age  
234 group (60-64y) than the youngest age (group 29-34y), and in those classified as obese  
235 compared to normal weight participants (Table 2;  $p < 0.01$ ). Figure 1 presents box plots  
236 (median and IQR) of PAEE by three age categories and three BMI groups (29-44y, 45-  
237 54y, 55-64y; normal weight, overweight, obese) and is reflective of the overall age and  
238 BMI trends with respect to PAEE. In both men and women, PAEE was highest in  
239 younger age categories and progressively lower in those 45 years and onwards. PAEE  
240 was consistently lower with advancing age than MVPA, which was not significantly  
241 different in either sex between those in their 30s and 40s, but lower in those in the 6<sup>th</sup>  
242 and 7<sup>th</sup> decade of life (Table 2). Similarly, those with the lowest BMI recorded the  
243 highest levels of PA, with gradually lower levels noted with higher BMI; a trend which  
244 was more pronounced in women. Sensitivity analysis conducted with allometrically  
245 scaled PAEE confirmed BMI to be a significant correlate of PAEE and MVPA, with

246 differences between normal weight and obese participants preserved (Supplementary  
247 Table 3). Proportion of week/weekend wear was not associated with PAEE but there  
248 was a trend towards those recruited later in the study period of 2005 to 2015 having  
249 lower activity levels.

250  
251 Across the sample, LPA was the primary contributor of energy to total PAEE (59%  
252 women, 51% men), although men accumulated higher levels of MPA and VPA than  
253 women (Figure 2). However, the majority of time was spent asleep or sedentary (70%  
254 women, 69% men), demonstrating the paradox that participants spent a relatively small  
255 fraction of the day accumulating most of their PAEE. Women spent almost all their time  
256 below 9 METs and men below 11 METS (Supplementary Figure 1). Time use  
257 demonstrated a similar association with age as for PAEE; time in LPA was lower in  
258 older participants, with a reciprocal higher time spent asleep or sedentary. This was  
259 accompanied by a commensurate lower PAEE derived from LPA in older participants.

260  
261 Multivariable analysis (Table 2) showed further correlates of PA, including ethnicity,  
262 work-type, income, and smoker status. Ethnic minorities tended to be less active than  
263 White participants, although the sample sizes of some groups are too small to assess  
264 this with certainty. Participants with more physically demanding jobs also had higher  
265 activity levels; however retired individuals were more active than those with sedentary  
266 occupations. When adjusted for all other socioeconomic variables, this equated to  
267 women in manual occupations accumulating  $13 \text{ kJ}\cdot\text{day}^{-1}\cdot\text{kg}^{-1}$  more PAEE than those in  
268 sedentary jobs, and 38 and 18 more minutes of MVPA in bouts of >1 minute and >10

269 minutes respectively. In men, corresponding differences were  $16 \text{ kJ}\cdot\text{day}^{-1}\cdot\text{kg}^{-1}$ , 56 and  
270 29 min/day.

271  
272 Education was not significantly associated with PA after adjustment (Table 2). However,  
273 there was some indication of higher activity levels in those with higher socio-economic  
274 status, more so in men for income level. This picture was mixed as demonstrated by the  
275 higher activity in men and trend towards lower activity in women from the Wisbech site,  
276 compared to the more affluent Cambridge site. A sex difference was also observed for  
277 civil status, in that marriage (current or former) was positively associated with activity in  
278 men but tended to be inversely associated in women, compared to single status.  
279 Current and former smokers tended to have higher PAEE and MVPA than non-smokers  
280 for both sexes; however, smokers moved less when only considering the accelerometry  
281 component (Supplementary Table 2). Participants who were measured in the summer  
282 were more active than those measured in the winter; this difference was twice as big in  
283 men as in women, i.e. 20-min and 10-min difference in 1-minute bouted MVPA between  
284 mid-winter and mid-summer.

285  
286 Overall, compliance with the current UK PA guidelines (as defined by 150 minutes of  
287 MVPA per week in bouts > 10minutes) was higher in men than in women; 49% of  
288 women and 74% of men accumulated at least 21.4 min of MVPA/day (equivalent to  
289 meeting the guidelines of 150 min MVPA per week) in bouts lasting 10-min or longer  
290 when MVPA was defined as > 3 METs. When redefined at MVPA > 3 METs of at least  
291 1-minute duration, however, compliance was 86% and 96%, respectively. Conversely,

292 redefining MVPA with the higher 4 METs cut-off naturally resulted in lower absolute  
293 levels of MVPA and guideline compliance, as highlighted in Figure 3. Using a 4 MET  
294 threshold and 10-minute bout definition, only 15% of women and 31% of men  
295 accumulated the recommended levels of MVPA. Participants accumulated less than half  
296 the amount of 10-minute bouted MVPA than 1-minute bouted MVPA, irrespective of sex  
297 or MVPA cut-offs. Using the stricter definition of MVPA, sensitivity analyses of the  
298 association with sociodemographic factors (Supplementary Table 1) showed largely  
299 similar patterns of association to the primary analysis.

300

### 301 **Discussion**

302 In this study we present the descriptive epidemiology of physical activity in a population-  
303 sample of UK adults. To our knowledge, this is the first study that describes socio-  
304 demographic patterns of both PAEE and its underlying intensity distribution in a large  
305 cohort of younger to middle-aged adults.

306

307 Our results indicate that men accumulate higher levels of PAEE than women across all  
308 ages; a finding consistent with other descriptive studies [7, 22–24]. Men also  
309 accumulate higher levels of MVPA and expend more of their energy at higher intensities  
310 than women. Despite the energy expenditure differences between men and women as  
311 measured by combined sensing, there was no sex difference in movement as measured  
312 by accelerometry, as has also been observed in other cohorts [25].

313

314 Among both men and women PA was lower in older individuals. Moreover, the levels  
315 and age-associated differences in PAEE demonstrated in Figure 1 are similar to that  
316 recently reported in UK nationally representative samples [7], and the age association  
317 remained significant in multivariable analysis (Table 2). Although PAEE and MVPA were  
318 highest in young adults, the pattern of association with age was quite different. Whereas  
319 PAEE was significantly different between all but the youngest two groups in women and  
320 youngest three groups in men, MVPA in >1-min bouts was only significantly different  
321 between the reference groups and those above 50y ( $p < 0.05$ ). Furthermore, MVPA in  
322 10-min bouts was only significantly different between the youngest group and the oldest  
323 two age groups in both sexes. This finding suggests that intensity patterns of PA may  
324 be preserved differently as people age, with light LPA replaced by sedentary behaviour  
325 proportionally more rapidly than decreases in MVPA.

326  
327 Normal-weight individuals accumulated higher levels of all activity outcomes than obese  
328 individuals. The difference in PAEE between normal weight and obese women was  
329 similar to the difference between sedentary and manual workers and between  
330 participants in the oldest and youngest age categories. The same comparisons hold  
331 true for men. This finding was consistent in a sensitivity analysis for allometrically scaled  
332 PAEE (Supplementary Table 3), suggesting that obesity is negatively associated with  
333 levels of PA in both sexes, irrespective of the effect of body size on absolute energy  
334 expenditure.

335

336 In terms of socio-demographic correlates of PAEE and MVPA, our unadjusted results  
337 demonstrated that educational level, income, work type, and smoking status were  
338 associated with PAEE and MVPA in women and men. Yet, when mutually adjusted in  
339 the multivariable analysis, some of these differences were attenuated. For example,  
340 univariable analysis showed a  $16 \text{ kJ}\cdot\text{day}^{-1}\cdot\text{kg}^{-1}$  difference between men with sedentary  
341 jobs and men with manual jobs. Likewise, univariable analysis modelled a  $6 \text{ kJ}\cdot\text{day}^{-1}\cdot\text{kg}^{-1}$   
342 difference between men with a basic education compared to those with higher  
343 education. When controlled for all sociodemographic covariates, the association  
344 between PAEE and education in men decreased in magnitude and significance,  
345 whereas the association with different work types remained significant, and of an order  
346 of magnitude almost identical to univariable analysis. A similar trend was evident in  
347 women. This is due to the strong correlations between certain sociodemographic  
348 variables such as lower levels of education and manual work. Conversely, higher levels  
349 of education tended to be associated with less PA (in men) but must be balanced  
350 against the higher levels of PAEE and MVPA seen with increasing income.

351  
352 Similarly, the higher attributed levels of PAEE in smokers should be considered in the  
353 context of significantly lower accelerometry-measured PA in current smokers of both  
354 sexes in multivariable analysis (Supplementary Table 3). Smoking is known to increase  
355 energy expenditure, independent of movement and resting energy expenditure [26].  
356 Moreover, this combination of results may be a partial by-product of the acute increase  
357 in heart rate of 15 beats/min that has been observed in cigarette smokers [27], which  
358 may have biased the estimates of energy expenditure.



359  
360 The levels of PAEE in the Fenland cohort are comparable to those reported in the  
361 nationally representative sample of the UK population studied with the gold-standard  
362 method of doubly labelled water in NDNS [7]. That study reported mean (SD) PAEE of  
363 52 (20) and 47 (17)  $\text{kJ}\cdot\text{day}^{-1}\cdot\text{kg}^{-1}$  in women aged 16–49 and 50–64 respectively. By  
364 contrast, men accumulated 63 (23) and 54 (20)  $\text{kJ}\cdot\text{day}^{-1}\cdot\text{kg}^{-1}$  in the same age groups.  
365 The Cambridge-based ROOTS study reported higher PAEE levels of 83.5 and 65.9  
366  $\text{kJ}\cdot\text{day}^{-1}\cdot\text{kg}^{-1}$  in 825, 16-year old boys and girls respectively [8]. By contrast, Golubic et  
367 al reported comparatively lower PAEE levels in the nationally representative 1946 birth  
368 cohort of British women and men assessed at age 60-64 years (median (IQR) PAEE:  
369 33.5 and 35.5  $\text{kJ}\cdot\text{day}^{-1}\cdot\text{kg}^{-1}$  respectively) [9], suggesting possible regional differences  
370 within the UK.

371  
372 Comparing the Fenland cohort to populations living in locations of differing global  
373 developmental indices, we note that various rural cohorts in Africa are more active.  
374 However, while men living in urban environments in developing countries have  
375 comparable levels of PA to their Cambridgeshire counterparts, women are notably less  
376 active. For example, Kenyan men of Kamba, Maasai and Luo ethnic origins had PAEE  
377 levels of 81, 78 and 74  $\text{kJ}\cdot\text{day}^{-1}\cdot\text{kg}^{-1}$  (age-adjusted to 40 years), respectively [23]. In  
378 contrast, Cameroonian and Barbadian urban men recorded comparable levels of PAEE  
379 to Fenland men (Cameroon: 52  $\text{kJ}\cdot\text{day}^{-1}\cdot\text{kg}^{-1}$ , 37-years-old; Barbadian: 47  $\text{kJ}\cdot\text{day}^{-1}\cdot\text{kg}^{-1}$ ,  
380 25-54 years-old) whereas Fenland women were more active than the women in those  
381 populations (Cameroon: 38  $\text{kJ}\cdot\text{day}^{-1}\cdot\text{kg}^{-1}$ , 38-years-old; Barbadian: 36  $\text{kJ}\cdot\text{day}^{-1}\cdot\text{kg}^{-1}$ , 25-

382 54 years-old) [22, 24]. This suggests different sex-specific determinants of PAEE in the  
383 developed as opposed to the developing world, and rural compared to urbanised  
384 environments.

385  
386 Our study also demonstrates how the definition of MVPA influences the reported  
387 prevalence of compliance with physical activity guidelines. At a time when PA  
388 guidelines are undergoing review [28], the difference in the quantity of MVPA  
389 accumulated in bouts of at least 1-min duration vs at least 10-min duration is critical.  
390 Through the simple abolition of the 10-min bouted criterion, apparent compliance falls  
391 from 86% to 49% in women and 96% to 74% in men (Figure 3). This difference reflects  
392 characterisation according to the new US guidelines [4], as opposed to the 2010 UK  
393 guidelines [5]. Furthermore, the new US guidelines emphasise the role of all physical  
394 activity in health. Our study suggests that LPA plays a crucial role in the accumulation of  
395 overall PAEE, accounting for roughly two thirds of PAEE in women and over half of  
396 PAEE in men (Figure 2). Indeed, without reasonable levels of LPA, it is hard to  
397 accumulate high levels of PAEE. Therefore, LPA's role in health should not be  
398 underestimated.

399  
400 Strengths of this study include individually calibrated combined heart rate and  
401 movement-based assessment of PAEE and underlying intensity in a large population-  
402 based sample that compares well in terms of PAEE with a nationally representative  
403 sample measured by gold-standard measures (i.e. NDNS)[7]. The large sample allowed  
404 for detailed description of physical activity by several sociodemographic variables. A

405 further strength is our ability to quantify potential selection bias by comparison of the  
406 recruited cohort to the sampling frame population in Cambridgeshire. Whilst this does  
407 suggest that the participants are slightly healthier (lower BMI, smoke less, and drink  
408 fewer units of alcohol per week) and live in less deprived areas, the differences are  
409 small and their likely impact on quantified activity levels not always in the same  
410 direction, hence some of the bias will cancel out. Limitations of the study include its lack  
411 of representativeness compared to the rest of the UK, in particular the predominance of  
412 White participants.

413

#### 414 **Conclusions**

415 In this study we have described the objectively measured physical activity levels of  
416 young to middle-aged adults in the East of England, which are similar to those reported  
417 in the nationally representative NDNS study [7]. As with other British studies age, sex  
418 and BMI were important correlates of physical activity. We have additionally shown work  
419 type, income and smoker status to be associated with MVPA and energy expenditure.  
420 Overall, 86% of women and 96% of men met the most liberal criteria for the PA  
421 guidelines compared to 15% and 31% respectively for the strictest. Uniquely, we have  
422 identified LPA as the main driver of PAEE; a component of PA that is currently not  
423 quantified as a target in UK guidelines.

424

#### 425 **List of abbreviations**

426 BMI – Body mass index

427 LPA – Light physical activity

- 428 MET(s) – Metabolic equivalent of task  
429 MPA – Moderate physical activity  
430 MVPA – Moderate-to-vigorous physical activity  
431 NDNS – National Diet and Nutrition Survey  
432 PA – Physical activity  
433 PAEE – Physical activity energy expenditure  
434 SS – Sedentary and sleep  
435 VPA – Vigorous physical activity

436

437 **Declarations**

438 Ethics approval and consent to participate

439 All participants provided written informed consent and the study was approved by the  
440 local ethics committee (NRES Committee – East of England Cambridge Central) and  
441 performed in accordance with the Declaration of Helsinki.

442 Consent for publication

443 Not applicable

444 Availability of data and material

445 The datasets generated and analysed during the current study are available at request  
446 via the MRC Epidemiology website ([http://www.mrc-epid.cam.ac.uk/research/data-](http://www.mrc-epid.cam.ac.uk/research/data-sharing/)  
447 [sharing/](http://www.mrc-epid.cam.ac.uk/research/data-sharing/))

448 Competing interests

449 The authors declare that they have no competing interests.

450 Funding

451 The Fenland study was funded by the Medical Research Council and the Wellcome  
452 Trust. The current work was supported by the Medical Research Council (S.B., K.Wi.,  
453 S.H., grant number MC\_UU\_12015/3), (S.G., grant number MC\_UU\_12015/4), (N.K.,  
454 N.W., grant number MC\_UU\_12015/1), (N.G.F., grant number MC\_UU\_12015/5); the  
455 National Institute of Health Research Cambridge (NIHR) Biomedical Research Centre  
456 (K.We., S.B., N.G.F., and N.W., grant number IS-BRC-1215-20014); and the Cambridge  
457 Trust and St Catharine's College (T.L.). The funders had no role in the design, analysis  
458 or writing of this article.

459 Authors' contributions

460 The authors contributed to the present manuscript as follows: Idea for analysis (TL, SB);  
461 acquisition, analysis of raw physical activity data (KW, SH, SB); acquisition, analysis of  
462 General Practice data (NK, TL), epidemiological data analysis (TL); drafting of the  
463 manuscript (TL); revising work critically for important intellectual content (all authors);  
464 approval of the final version before submission (all authors). Chief Investigator (NJW)  
465 and Principal Investigators (NF, SG, SB) of the Fenland Study.

466

467 Acknowledgements

468 We are grateful to the Fenland Study participants for their willingness and time to take  
469 part. We thank all members of the following teams responsible for practical aspects of  
470 the study; Study Coordination, Field Epidemiology, Anthropometry Team, Physical  
471 Activity Technical Team, IT, Data Management, and Statistics.

472

473 **References:**

- 474 1. Lee I-M, Shiroma EJ, Lobelo F, Puska P, Blair SN, Katzmarzyk PT, et al. Effect of  
475 physical inactivity on major non-communicable diseases worldwide: an analysis of  
476 burden of disease and life expectancy. *Lancet*. 2012;380:219–29. doi:10.1016/S0140-  
477 6736(12)61031-9.
- 478 2. Smith AD, Crippa A, Woodcock J, Brage S. Physical activity and incident type 2  
479 diabetes mellitus: a systematic review and dose–response meta-analysis of prospective  
480 cohort studies. *Diabetologia*. 2016;59:2527–45. doi:10.1007/s00125-016-4079-0.
- 481 3. Hansen A-LS, Carstensen B, Helge JW, Johansen NB, Gram B, Christiansen JS, et  
482 al. Combined Heart Rate– and Accelerometer-Assessed Physical Activity Energy  
483 Expenditure and Associations With Glucose Homeostasis Markers in a Population at  
484 High Risk of Developing Diabetes. *Diabetes Care*. 2013;36:3062–9. doi:10.2337/DC12-  
485 2671.
- 486 4. Piercy KL, Troiano RP, Ballard RM, Carlson SA, Fulton JE, Galuska DA, et al. The  
487 Physical Activity Guidelines for Americans. *JAMA*. 2018;320:2020.  
488 doi:10.1001/jama.2018.14854.
- 489 5. Bull FC, The Expert Working Groups. Physical Activity Guidelines in the UK: Review  
490 and Recommendations. *Sch Sport Exerc Heal Sci Loughbrgh Univ*. 2010.  
491 doi:10.1071/EA03155.
- 492 6. Van Remoortel H, Camillo CA, Langer D, Hornikx M, Demeyer H, Burtin C, et al.  
493 Moderate intense physical activity depends on selected Metabolic Equivalent of Task  
494 (MET) cut-off and type of data analysis. *PLoS One*. 2013;8:e84365.  
495 doi:10.1371/journal.pone.0084365.

- 496 7. Brage S, Lindsay T, Venables M, Wijndaele K, Westgate K, Collins D, et al.  
497 Descriptive epidemiology of energy expenditure in the UK: Findings from the National  
498 Diet and Nutrition Survey 2008 to 2015. *bioRxiv*. 2019;:542613. doi:10.1101/542613.
- 499 8. Collings PJ, Wijndaele K, Corder K, Westgate K, Ridgway CL, Dunn V, et al. Levels  
500 and patterns of objectively-measured physical activity volume and intensity distribution  
501 in UK adolescents: the ROOTS study. *Int J Behav Nutr Phys Act*. 2014;11:23.  
502 doi:10.1186/1479-5868-11-23.
- 503 9. Golubic R, Martin KR, Ekelund U, Hardy R, Kuh D, Wareham N, et al. Levels of  
504 physical activity among a nationally representative sample of people in early old age:  
505 results of objective and self-reported assessments. *Int J Behav Nutr Phys Act*.  
506 2014;11:58. doi:10.1186/1479-5868-11-58.
- 507 10. Brage S, Brage N, Franks PW, Ekelund U, Wareham NJ. Reliability and validity of  
508 the combined heart rate and movement sensor Actiheart. *Eur J Clin Nutr*. 2005;59:561.  
509 <https://doi.org/10.1038/sj.ejcn.1602118>.
- 510 11. Brage S, Ekelund U, Brage N, Hennings MA, Froberg K, Franks PW, et al.  
511 Hierarchy of individual calibration levels for heart rate and accelerometry to measure  
512 physical activity. *J Appl Physiol*. 2007;103:682–92.  
513 doi:10.1152/jappphysiol.00092.2006.
- 514 12. Tanaka H, Monahan KD, Seals DR. Age-Predicted Maximal Heart Rate Revisited.  
515 2001. doi:10.1016/S0735-1097(00)01054-8.
- 516 13. Stegle O, Fallert S V, on ... DJC. Gaussian process robust regression for noisy  
517 heart rate data. *Gaussian Process robust Regres noisy Hear rate data*. 2008.  
518 <http://scholar.google.com/scholar?q=Gaussian process robust regression for noisy heart>

- 519 rate data&btnG=&hl=en&num=20&as\_sdt=0%2C22 VN - readcube.com.
- 520 14. Brage S, Brage N, Franks PW, Ekelund U, Wong M-Y, Andersen LB, et al.
- 521 Branched equation modeling of simultaneous accelerometry and heart rate monitoring
- 522 improves estimate of directly measured physical activity energy expenditure. *J Appl*
- 523 *Physiol.* 2004;96:343–51. doi:10.1152/jappphysiol.00703.2003.
- 524 15. Strath SJ, Brage S, Ekelund U. Integration of physiological and accelerometer data
- 525 to improve physical activity assessment. *Med Sci Sports Exerc.* 2005;37 11
- 526 Suppl:S563-71. <http://www.ncbi.nlm.nih.gov/pubmed/16294119>. Accessed 11 Mar
- 527 2019.
- 528 16. Thompson D, Batterham AM, Bock S, Robson C, Stokes K. Assessment of Low-to-
- 529 Moderate Intensity Physical Activity Thermogenesis in Young Adults Using
- 530 Synchronized Heart Rate and Accelerometry with Branched-Equation Modeling. *J Nutr.*
- 531 2006;136:1037–42. doi:10.1093/jn/136.4.1037.
- 532 17. Stegle O, Fallert S V., MacKay DJC, Brage S. Gaussian process robust regression
- 533 for noisy heart rate data. *IEEE Trans Biomed Eng.* 2008;55:2143–51.
- 534 doi:10.1109/TBME.2008.923118.
- 535 18. Brage S, Westgate K, Wijndaele K, Godinho J, Griffin S, Wareham N. Evaluation of
- 536 a method for minimising diurnal information bias in objective sensor data. In: *ICAMPAM*
- 537 (Amherst). 2013.
- 538 19. Brage S, Westgate K, Franks PW, Stegle O, Wright A, Ekelund U, et al. Estimation
- 539 of free-living energy expenditure by heart rate and movement sensing: A doubly-
- 540 labelled water study. *PLoS One.* 2015;10:1–19. doi:10.1371/journal.pone.0137206.
- 541 20. White CR, Seymour RS, Thompson MB. Allometric scaling of mammalian



- 542 metabolism. *J Exp Biol.* 2005;208 Pt 9:1611–9. doi:10.1242/jeb.01501.
- 543 21. Sarrus M, Rameaux J. Rapport sur un memoire adresse a l'academie royale de  
544 medicine. *Bull l'Academie R Med Paris.* 1883;3:1094–100.  
545 <http://ci.nii.ac.jp/naid/10025722524/en/>. Accessed 18 Dec 2018.
- 546 22. Assah F, Mbanya JC, Ekelund U, Wareham N, Brage S. Patterns and correlates of  
547 objectively measured free-living physical activity in adults in rural and urban Cameroon.  
548 2015;69:700–7. <http://www.ncbi.nlm.nih.gov/pubmed/25841243>. Accessed 9 Jan 2019.
- 549 23. Christensen DL, Faurholt-Jepsen D, Boit MK, Mwaniki DL, Kilonzo B, Tetens I, et al.  
550 Cardiorespiratory fitness and physical activity in Luo, Kamba, and Maasai of rural  
551 Kenya. *Am J Hum Biol.* 2012;24:723–9. doi:10.1002/ajhb.22303.
- 552 24. Howitt C, Brage S, Hambleton IR, Westgate K, Samuels TA, Rose AM, et al. A  
553 cross-sectional study of physical activity and sedentary behaviours in a Caribbean  
554 population: combining objective and questionnaire data to guide future interventions.  
555 2016. doi:10.1186/s12889-016-3689-2.
- 556 25. Doherty A, Jackson D, Hammerla N, Plötz T, Olivier P, Granat MH, et al. Large  
557 scale population assessment of physical activity using wrist worn accelerometers: The  
558 UK biobank study. *PLoS One.* 2017;12:1–14.
- 559 26. Hofstetter A, Schutz Y, Jéquier E, Wahren J. Increased 24-Hour Energy  
560 Expenditure in Cigarette Smokers. *N Engl J Med.* 1986;314:79–82.  
561 doi:10.1056/NEJM198601093140204.
- 562 27. Houlihan ME, Pritchard WS, Robinson JH. A double blind study of the effects of  
563 smoking on heart rate: is there tachyphylaxis? *Psychopharmacology (Berl).*  
564 1999;144:38–44. <http://www.ncbi.nlm.nih.gov/pubmed/10379622>. Accessed 3 May

565 2019.

566 28. Murphy MH, Broom DR, Gill JMR, Gray CM, Jones A, Steele J, et al. UK physical  
567 activity guidelines: Draft review and recommendations for adults (aged 19-64 years).  
568 2018. [http://www.bristol.ac.uk/media-library/sites/sps/documents/cmo/adults-technical-](http://www.bristol.ac.uk/media-library/sites/sps/documents/cmo/adults-technical-report.pdf)  
569 [report.pdf](http://www.bristol.ac.uk/media-library/sites/sps/documents/cmo/adults-technical-report.pdf). Accessed 2 Jul 2019.

570

571 **Table and figure captions:**

572 **Table 1:** Participant characteristics. The Fenland Study 2005 to 2015.

573 **Table 2:** Multivariable analysis of physical activity by socio-demographic factors. The  
574 Fenland Study 2005 to 2015.

575 **Figure 1:** Sex stratified physical activity energy expenditure (PAEE) in kJ/day/kg by age  
576 and BMI in the Fenland cohort. Men accumulated higher levels of PAEE than women,  
577 with younger participants accumulating more PA regardless of sex. PAEE is inversely  
578 related to BMI. Box plots represent medians and interquartile ranges.

579 **Figure 2:** Sex stratified intensities of physical activity by time (minutes per day) and  
580 energy expenditure (kJ/day/kg) in the Fenland cohort. SS = sedentary or sleep (<1.5  
581 METs); LPA = light physical activity (1.5-3METs); MPA = moderate physical activity (3-  
582 6METs); VPA = vigorous physical activity (>6METs) Box plots represent medians and  
583 interquartile ranges.

584 **Figure 3:** Sex stratified moderate to vigorous physical activity (MVPA) of differing bout  
585 lengths, according to 2 intensity thresholds in the Fenland cohort. The solid grey line  
586 indicates compliance with UK physical activity guidelines, the dashed line represents  
587 double the UK guidelines. Box plots represent medians and interquartile ranges.

588 **Supplementary Table 1:** Comparison of Fenland sampling frame and study  
589 subpopulation. The Fenland Study 2005 to 2015.

590 **Supplementary Table 2:** Univariable analysis of physical activity by socio-demographic  
591 factors in women. The Fenland Study 2005 to 2015.

592 **Supplementary Table 3:** Multivariable analysis of socio-demographic factors in men  
593 using accelerometry counts, allometric scaling of body weight for PAEE, and a higher  
594 intensity criterion for MVPA. The Fenland Study 2005 to 2015.

595 **Supplementary Figure 1:** Sex stratified time (minutes per day) across the full  
596 spectrum of physical activity intensities in the Fenland cohort. Men accumulated higher  
597 levels of very vigorous physical activity than women, although both sexes accumulated  
598 relatively little activity over 5 METs. Box plots represent medians and interquartile  
599 ranges.

600

601

602

603

604

605

606

607

608

609

610

611 **Tables:**

**Table 1: Participant Characteristics. The Fenland Study 2005 to 2015.**

|                                                | Women<br>n = 6428 |      | Men<br>n = 5574 |      |
|------------------------------------------------|-------------------|------|-----------------|------|
| <b>Age (years)</b>                             | 48.7              | 7.4  | 48.6            | 7.6  |
| <b>BMI (kg/m<sup>2</sup>)</b>                  | 26.5              | 5.3  | 27.3            | 4.1  |
| <b>Ethnicity</b>                               |                   |      |                 |      |
| White                                          | 5954              | 92.6 | 5165            | 92.7 |
| South Asian                                    | 74                | 1.2  | 75              | 1.4  |
| Black                                          | 30                | 0.5  | 31              | 0.6  |
| East Asian                                     | 44                | 0.7  | 20              | 0.4  |
| Others or unknown                              | 326               | 5.0  | 283             | 5.1  |
| <b>Education level</b>                         |                   |      |                 |      |
| Basic                                          | 1442              | 22.4 | 1005            | 18.0 |
| Further                                        | 2923              | 45.5 | 2601            | 46.7 |
| Higher                                         | 2063              | 32.1 | 1968            | 35.3 |
| <b>Work type</b>                               |                   |      |                 |      |
| Sedentary                                      | 3014              | 46.9 | 2860            | 51.3 |
| Standing                                       | 2011              | 31.3 | 768             | 13.8 |
| Manual work                                    | 481               | 7.5  | 1623            | 29.1 |
| Retired                                        | 230               | 3.6  | 134             | 2.4  |
| Unemployed                                     | 74                | 1.2  | 73              | 1.3  |
| Unknown                                        | 618               | 9.6  | 116             | 2.1  |
| <b>Income</b>                                  |                   |      |                 |      |
| < £20000                                       | 1064              | 16.6 | 552             | 9.9  |
| £20000 - £40000                                | 2282              | 35.5 | 1853            | 33.2 |
| > £40000                                       | 2871              | 44.7 | 3057            | 54.8 |
| <b>Marital Status</b>                          |                   |      |                 |      |
| Single                                         | 422               | 6.6  | 418             | 7.5  |
| Married/living as married                      | 3990              | 62.1 | 3605            | 64.7 |
| Widowed/separated/divorced                     | 567               | 8.8  | 309             | 5.5  |
| Unknown                                        | 1449              | 22.5 | 1242            | 22.3 |
| <b>Smoker Status</b>                           |                   |      |                 |      |
| Never smoked                                   | 3590              | 55.9 | 2871            | 51.5 |
| Ex smoker                                      | 2061              | 32.1 | 1900            | 34.1 |
| Current smoker                                 | 701               | 10.9 | 742             | 13.3 |
| <b>Site</b>                                    |                   |      |                 |      |
| Cambridge                                      | 2249              | 35.0 | 2096            | 37.6 |
| Ely                                            | 2438              | 37.9 | 1968            | 35.3 |
| Wisbech                                        | 1741              | 27.1 | 1510            | 27.1 |
| <b>PAEE (kJ/day/kg)</b>                        | 49.7              | 19.6 | 58.8            | 23.0 |
| <b>MVPA in bouts &gt; 1 minute (min/day)</b>   | 83.4              | 67.2 | 124.0           | 84.7 |
| <b>MVPA in bouts &gt; 10 minutes (min/day)</b> | 32.9              | 39.4 | 60.3            | 58.3 |
| <b>Accelerometry (m/s<sup>2</sup>)</b>         | 0.12              | 0.06 | 0.12            | 0.05 |

Data are mean (SD) or n (%)

**Table 2: Multivariable analysis of physical activity by socio-demographic factors in women. The Fenland Study 2005 to 2015.**

|                        | Women<br>n = 6428       |               |                                               |               |                                                 |               |
|------------------------|-------------------------|---------------|-----------------------------------------------|---------------|-------------------------------------------------|---------------|
|                        | <u>PAEE (kJ/day/kg)</u> |               | <u>MVPA in bouts &gt; 1 minute (mins/day)</u> |               | <u>MVPA in bouts &gt; 10 minutes (mins/day)</u> |               |
|                        | Mean                    | 95% C.I       | Mean                                          | 95% C.I       | Mean                                            | 95% C.I       |
| <b>Age</b>             |                         |               |                                               |               |                                                 |               |
| 29 - 34                | Reference               | -             | Reference                                     | -             | Reference                                       | -             |
| 35 - 39                | -0.5                    | -3.5 - 2.4    | 1.6                                           | -8.7 - 11.9   | 0.6                                             | -5.6 - 6.8    |
| 40 - 44                | -4.0***                 | -6.8; - 1.1   | -5.4                                          | -15.4; 4.6    | -3.2                                            | -9.2; 2.8     |
| 45 - 49                | -6.0***                 | -8.8; - 3.1   | -8.8*                                         | -18.7; 1.2    | -4.0                                            | -10.0; 2.0    |
| 50 - 54                | -8.1***                 | -10.9; - 5.2  | -13.3***                                      | -23.2; - 3.3  | -4.6                                            | -10.6; 1.4    |
| 55 - 59                | -11.0***                | -13.9; - 8.1  | -21.1***                                      | -31.3; - 10.9 | -8.2***                                         | -14.3; - 2.0  |
| 60 - 64                | -13.8***                | -17.2; - 10.4 | -23.7***                                      | -35.6; - 11.7 | -10.9***                                        | -18.1; - 3.7  |
| <b>BMI</b>             |                         |               |                                               |               |                                                 |               |
| < 25                   | Reference               | -             | Reference                                     | -             | Reference                                       | -             |
| 25 - 30                | -6.2***                 | -7.2; - 5.2   | -20.7***                                      | -24.2; - 17.1 | -12.0***                                        | -14.1; - 9.8  |
| > 30                   | -14.6***                | -15.8; - 13.4 | -45.9***                                      | -50.0; - 41.9 | -24.1***                                        | -26.5; - 21.6 |
| <b>Ethnicity</b>       |                         |               |                                               |               |                                                 |               |
| White                  | Reference               | -             | Reference                                     | -             | Reference                                       | -             |
| South Asian            | -6.4***                 | -10.5; - 2.3  | -18.8**                                       | -33.2; - 4.5  | -9.9**                                          | -18.5; - 1.3  |
| Black                  | 0.7                     | -5.7; 7.1     | -1.3                                          | -23.6; 21.0   | -0.6                                            | -14.0; 12.8   |
| East Asian             | -7.0***                 | -12.3; - 1.7  | -22.6**                                       | -41.1; - 4.1  | -11.5**                                         | -22.6; - 0.4  |
| Others or unknown      | -4.2***                 | -6.3; - 2.0   | -13.4***                                      | -21.0; - 5.8  | -8.8***                                         | -13.3; - 4.2  |
| <b>Education level</b> |                         |               |                                               |               |                                                 |               |
| Basic                  | Reference               | -             | Reference                                     | -             | Reference                                       | -             |
| Further                | 0.5                     | -0.6; 1.7     | 0.0                                           | -4.0; 4.1     | -0.5                                            | -2.9; 1.9     |
| Higher                 | 1.2*                    | -0.2; 2.6     | 6.1**                                         | 1.3; 10.9     | 4.3***                                          | 1.4; 7.2      |

**Work type**

|             |           |            |           |             |           |            |
|-------------|-----------|------------|-----------|-------------|-----------|------------|
| Sedentary   | Reference | -          | Reference | -           | Reference | -          |
| Standing    | 6.4***    | 5.4; 7.5   | 13.4***   | 9.8; 17.0   | 3.7***    | 1.5; 5.8   |
| Manual work | 13.0***   | 11.3; 14.8 | 38.2***   | 32.1; 44.3  | 17.8***   | 14.2; 21.5 |
| Retired     | 3.5***    | 0.9; 6.2   | 11.3**    | 2.1; 20.6   | 6.3**     | 0.7; 11.8  |
| Unemployed  | 0.2       | -3.9; 4.3  | 2.0       | -12.4; 16.4 | 1.8       | -6.8; 10.5 |
| Unknown     | 5.0***    | 3.4; 6.6   | 11.3***   | 5.7; 16.8   | 5.3***    | 2.0; 8.6   |

**Income**

|                 |           |          |           |           |           |          |
|-----------------|-----------|----------|-----------|-----------|-----------|----------|
| < £20000        | Reference | -        | Reference | -         | Reference | -        |
| £20000 - £40000 | 2.8***    | 1.4; 4.2 | 6.7***    | 1.9; 11.5 | 3.1**     | 0.3; 6.0 |
| > £40000        | 4.5***    | 3.0; 5.9 | 13.0***   | 7.9; 18.1 | 4.2***    | 1.1; 7.3 |

**Marital Status**

|                            |           |           |           |               |           |              |
|----------------------------|-----------|-----------|-----------|---------------|-----------|--------------|
| Single                     | Reference | -         | Reference | -             | Reference | -            |
| Married/living as married  | -1.4      | -3.3; 0.5 | -10.2***  | -16.8; - 3.6  | -6.4***   | -10.3; - 2.5 |
| Widowed/separated/divorced | -0.4      | -2.6; 1.9 | -5.3      | -13.2; 2.6    | -6.0**    | -10.8; - 1.3 |
| Unknown                    | -0.7      | -2.7; 1.4 | -17.6***  | -24.9; - 10.3 | -6.9***   | -11.3; - 2.6 |

**Smoker Status**

|                |           |          |           |            |           |            |
|----------------|-----------|----------|-----------|------------|-----------|------------|
| Never smoked   | Reference | -        | Reference | -          | Reference | -          |
| Ex smoker      | 2.6***    | 1.6; 3.6 | 8.7***    | 5.3; 12.1  | 3.2***    | 1.1; 5.2   |
| Current smoker | 7.9***    | 6.4; 9.3 | 33.5***   | 28.4; 38.7 | 15.8***   | 12.7; 18.9 |

**Site**

|           |           |             |           |             |           |             |
|-----------|-----------|-------------|-----------|-------------|-----------|-------------|
| Cambridge | Reference | -           | Reference | -           | Reference | -           |
| Ely       | -1.1**    | -2.2; - 0.0 | -5.2***   | -9.1; - 1.3 | -4.7***   | -7.0; - 2.4 |
| Wisbech   | -0.5      | -1.7; 0.8   | -4.6**    | -9.0; - 0.3 | -6.6***   | -9.2; - 4.0 |

**Seasonality**

|        |         |             |         |             |         |             |
|--------|---------|-------------|---------|-------------|---------|-------------|
| Spring | -0.1    | -0.7; 0.5   | 1.8*    | -0.3; 3.9   | 1.5**   | 0.2; 2.8    |
| Winter | -1.7*** | -2.3; - 1.1 | -4.8*** | -7.0; - 2.6 | -1.9*** | -3.2; - 0.6 |

---

|          |         |            |         |             |         |            |
|----------|---------|------------|---------|-------------|---------|------------|
| Constant | 54.3*** | 50.7; 57.8 | 99.9*** | 87.5; 112.4 | 46.2*** | 38.8; 53.7 |
|----------|---------|------------|---------|-------------|---------|------------|

\*\*\* p<0.01, \*\* p<0.05, \* p<0.1

**Table 2 continued: Multivariable analysis of physical activity by socio-demographic factors in men. The Fenland Study 2005 to 2015.**

|                        | Men<br>n = 5574          |               |                                               |               |                                                 |               |
|------------------------|--------------------------|---------------|-----------------------------------------------|---------------|-------------------------------------------------|---------------|
|                        | <u>PAEE (kJ/day/kg )</u> |               | <u>MVPA in bouts &gt; 1 minute (mins/day)</u> |               | <u>MVPA in bouts &gt; 10 minutes (mins/day)</u> |               |
|                        | Mean                     | 95% C.I       | Mean                                          | 95% C.I       | Mean                                            | 95% C.I       |
| <b>Age</b>             |                          |               |                                               |               |                                                 |               |
| 29 - 34                | Reference                | -             | Reference                                     | -             | Reference                                       | -             |
| 35 - 39                | 1.1                      | -2.6; 4.7     | 4.6                                           | -9.2; 18.5    | 3.2                                             | -6.7; 13.1    |
| 40 - 44                | -1.9                     | -5.5; 1.7     | 1.3                                           | -12.3; 14.9   | 0.9                                             | -8.8; 10.6    |
| 45 - 49                | -5.9***                  | -9.5; -2.3    | -9.1                                          | -22.6; 4.4    | -3.7                                            | -13.3; 6.0    |
| 50 - 54                | -9.4***                  | -13.0; - 5.8  | -14.6**                                       | -28.2; - 1.1  | -5.3                                            | -14.9; 4.4    |
| 55 - 59                | -13.6***                 | -17.3; - 10.0 | -26.8***                                      | -40.6; - 13.0 | -12.6**                                         | -22.5; - 2.8  |
| 60 - 64                | -19.1***                 | -23.3; - 15.0 | -37.1***                                      | -52.8; - 21.4 | -18.3***                                        | -29.5; - 7.1  |
| <b>BMI</b>             |                          |               |                                               |               |                                                 |               |
| < 25                   | Reference                | -             | Reference                                     | -             | Reference                                       | -             |
| 25 - 30                | -3.4***                  | -4.7; - 2.1   | -13.9***                                      | -18.8; - 9.1  | -12.2***                                        | -15.7; - 8.8  |
| > 30                   | -10.1***                 | -11.6; - 8.5  | -41.0***                                      | -46.9; - 35.1 | -28.6***                                        | -32.8; - 24.4 |
| <b>Ethnicity</b>       |                          |               |                                               |               |                                                 |               |
| White                  | Reference                | -             | Reference                                     | -             | Reference                                       | -             |
| South Asian            | -7.6***                  | -12.3; - 2.9  | -30.3***                                      | -48.1; - 12.6 | -19.2***                                        | -31.8; - 6.5  |
| Black                  | -8.9**                   | -16.1; - 1.6  | -27.0*                                        | -54.4; 0.3    | -11.5                                           | -30.9; 8.0    |
| East Asian             | -4.7                     | -13.7; 4.3    | -14.0                                         | -48.0; 20.0   | -8.4                                            | -32.6; 15.9   |
| Others or unknown      | -3.9***                  | -6.7; - 1.2   | -12.2**                                       | -22.5; - 1.9  | -8.3**                                          | -15.6; - 0.9  |
| <b>Education level</b> |                          |               |                                               |               |                                                 |               |
| Basic                  | Reference                | -             | Reference                                     | -             | Reference                                       | -             |
| Further                | -1.3                     | -2.8; 0.3     | -6.1**                                        | -11.8; - 0.3  | -4.9**                                          | -9.0; - 0.8   |
| Higher                 | -1.7*                    | -3.5; 0.2     | -5.3                                          | -12.3; 1.7    | -1.2                                            | -6.2; 3.8     |

### Work type

|             |           |            |           |            |           |            |
|-------------|-----------|------------|-----------|------------|-----------|------------|
| Sedentary   | Reference | -          | Reference | -          | Reference | -          |
| Standing    | 8.5***    | 6.8; 10.2  | 28.2***   | 21.8; 34.6 | 11.1***   | 6.5; 15.6  |
| Manual work | 16.2***   | 14.7; 17.6 | 56.5***   | 51.0; 62.0 | 29.4***   | 25.5; 33.3 |
| Retired     | 6.2***    | 2.5; 10.0  | 23.9***   | 9.7; 38.0  | 16.3***   | 6.2; 26.4  |
| Unemployed  | 2.9       | -2.0; 7.7  | 11.7      | -6.8; 30.1 | 5.7       | -7.4; 18.9 |
| Unknown     | -2.1      | -6.1; 1.9  | -8.0      | -23.0; 7.0 | -4.5      | -15.2; 6.2 |

### Income

|                 |           |          |           |            |           |           |
|-----------------|-----------|----------|-----------|------------|-----------|-----------|
| < £20000        | Reference | -        | Reference | -          | Reference | -         |
| £20000 - £40000 | 5.3***    | 3.3; 7.4 | 12.5***   | 4.8; 20.2  | 2.7       | -2.8; 8.2 |
| > £40000        | 7.3***    | 5.2; 9.4 | 21.4***   | 13.4; 29.3 | 8.4***    | 2.7; 14.0 |

### Marital Status

|                            |           |           |           |            |           |            |
|----------------------------|-----------|-----------|-----------|------------|-----------|------------|
| Single                     | Reference | -         | Reference | -          | Reference | -          |
| Married/living as married  | 2.6**     | 0.4; 4.8  | 5.3       | -2.9; 13.5 | -0.5      | -6.3; 5.4  |
| Widowed/separated/divorced | 4.1***    | 1.1; 7.1  | 10.7*     | -0.8; 22.2 | 0.5       | -7.7; 8.7  |
| Unknown                    | 2.0       | -0.5; 4.4 | -7.6      | -16.9; 1.7 | -3.9      | -10.5; 2.8 |

### Smoker Status

|                |           |           |           |            |           |            |
|----------------|-----------|-----------|-----------|------------|-----------|------------|
| Never smoked   | Reference | -         | Reference | -          | Reference | -          |
| Ex smoker      | 2.2***    | 1.0; 3.4  | 8.0***    | 3.4; 12.5  | 5.0***    | 1.8; 8.2   |
| Current smoker | 8.7***    | 6.9; 10.4 | 42.3***   | 35.9; 48.8 | 26.2***   | 21.6; 30.8 |

### Site

|           |           |           |           |           |           |           |
|-----------|-----------|-----------|-----------|-----------|-----------|-----------|
| Cambridge | Reference | -         | Reference | -         | Reference | -         |
| Ely       | 0.1       | -1.3; 1.5 | -0.9      | -6.2; 4.4 | -1.8      | -5.6; 1.9 |
| Wisbech   | 2.4***    | 0.9; 4.0  | 8.1***    | 2.1; 14.0 | 1.8       | -2.4; 6.1 |

### Seasonality

|        |         |             |         |              |         |             |
|--------|---------|-------------|---------|--------------|---------|-------------|
| Spring | -0.8*   | -1.5; 0.0   | -2.4    | -5.2; 0.5    | -1.3    | -3.3; 0.7   |
| Winter | -2.8*** | -3.5; - 2.0 | -9.8*** | -12.7; - 6.9 | -6.2*** | -8.3; - 4.1 |

---

|          |         |            |          |             |         |            |
|----------|---------|------------|----------|-------------|---------|------------|
| Constant | 54.4*** | 49.9; 59.0 | 107.5*** | 90.2; 124.8 | 60.9*** | 48.6; 73.3 |
|----------|---------|------------|----------|-------------|---------|------------|

\*\*\* p<0.01, \*\* p<0.05, \* p<0.1



613 **Figures:**

614 **Figure 1:** Sex stratified physical activity energy expenditure (PAEE) in kJ/day/kg by age and BMI in the Fenland cohort. Men accumulated higher levels of PAEE than women, with  
 615 younger participants accumulating more PA regardless of sex. PAEE is inversely related to BMI. Box plots represent medians and interquartile ranges.

616

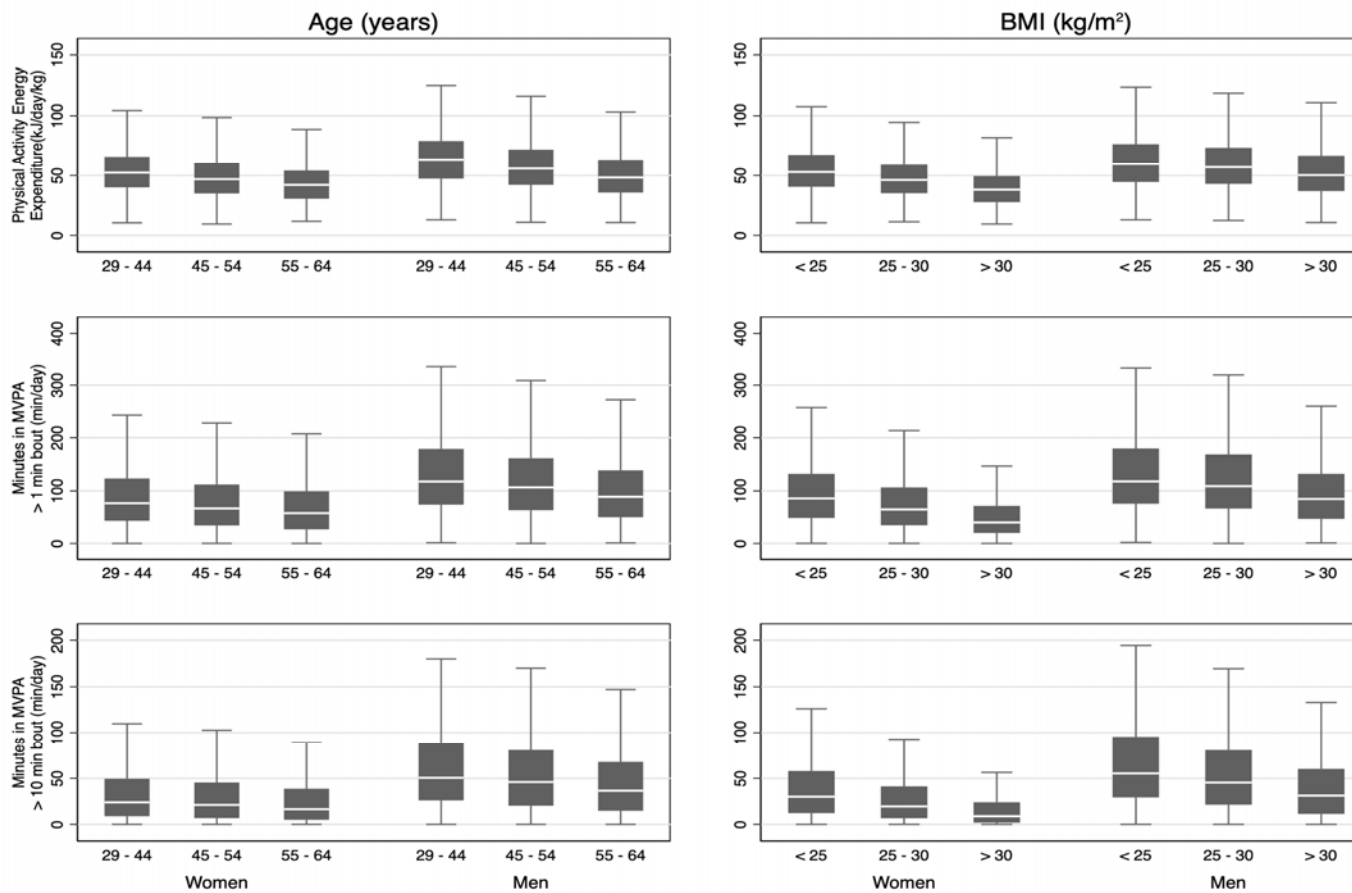

617

618 **Figure 2:** Sex stratified intensities of physical activity by time (minutes per day) and energy expenditure (kJ/day/kg) in the Fenland cohort. SS = sedentary or sleep (<1.5 METs); LPA  
 619 = light physical activity (1.5-3METs); MPA = moderate physical activity (3-6METs); VPA = vigorous physical activity (>6METs) Box plots represent medians and interquartile ranges.

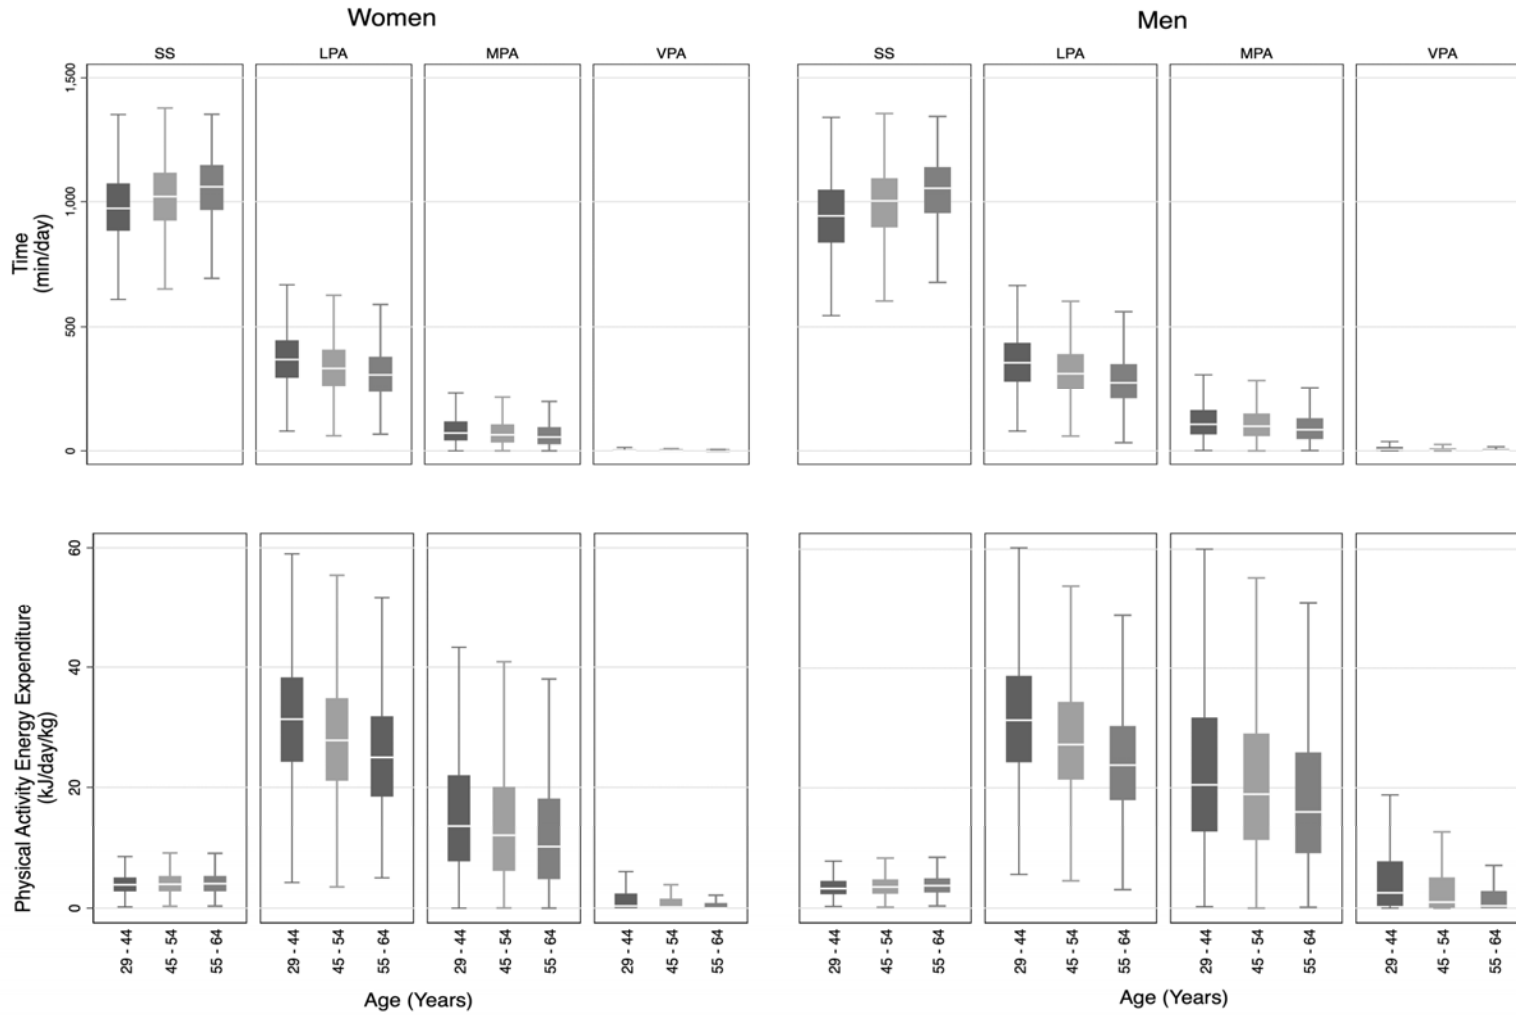

620

621 **Figure 3:** Sex stratified moderate to vigorous physical activity (MVPA) of differing bout lengths, according to 2 intensity thresholds in the Fenland cohort. The solid grey line indicates  
 622 compliance with UK physical activity guidelines, the dashed line represents double the UK guidelines. Box plots represent medians and interquartile ranges.

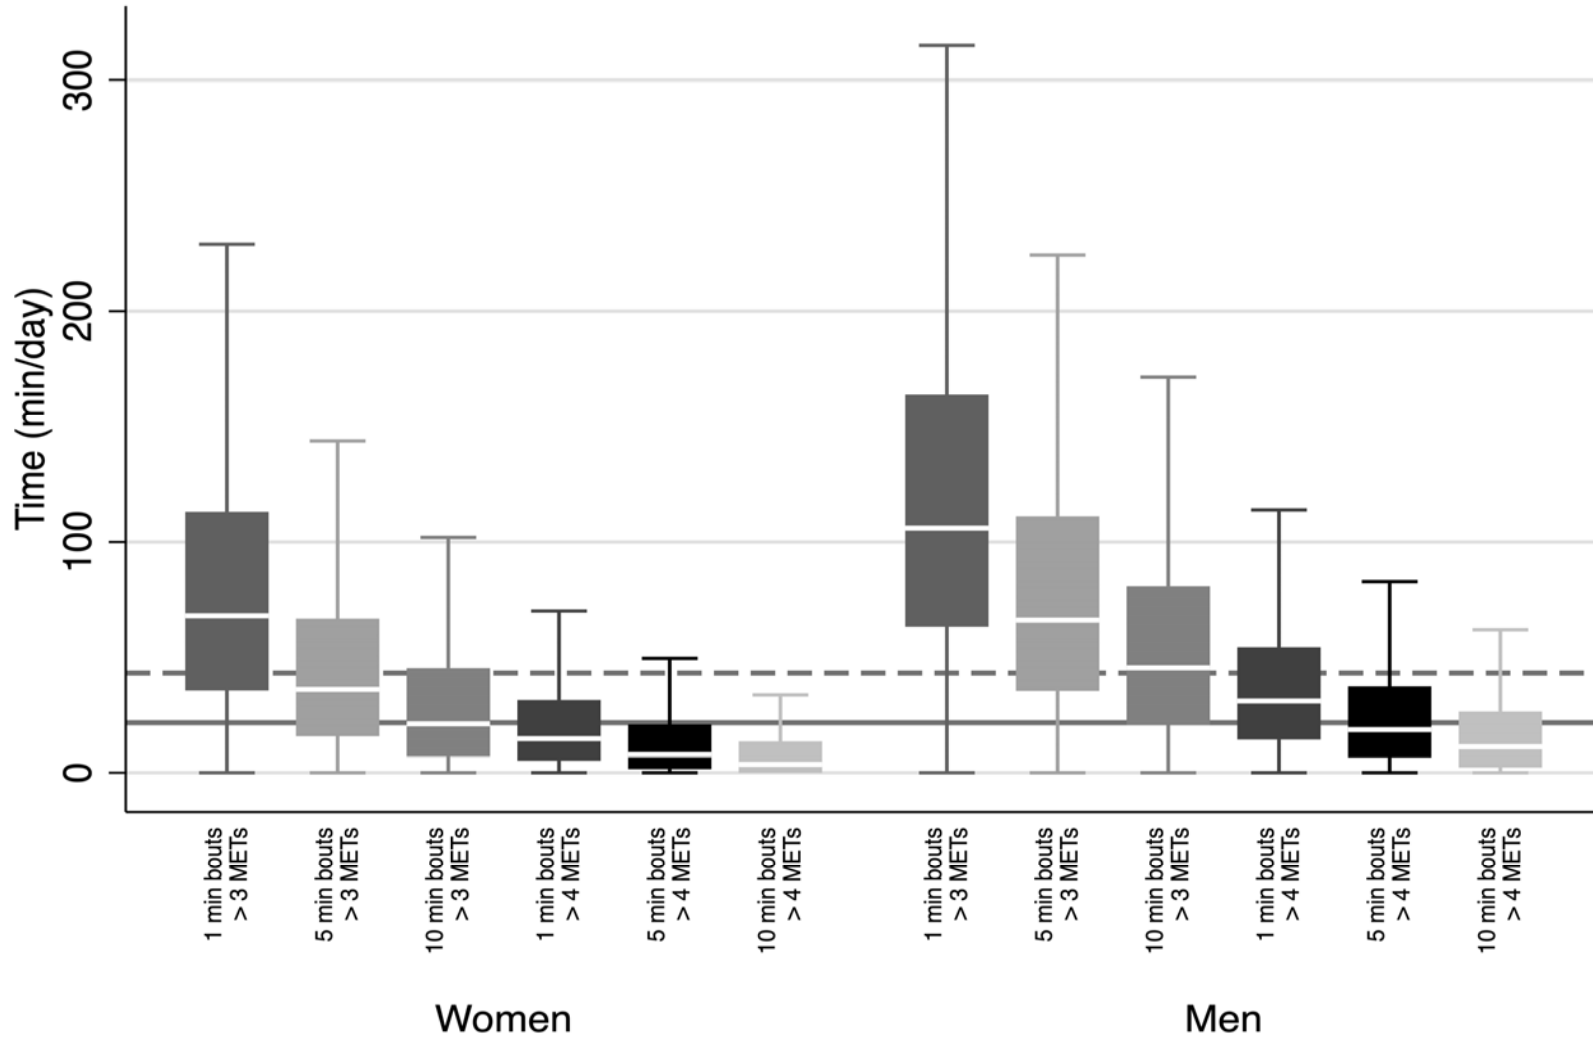

623
